# Supplementary material
Source: PubMed Central journal article supplement (PMC3575602)

Figure S1

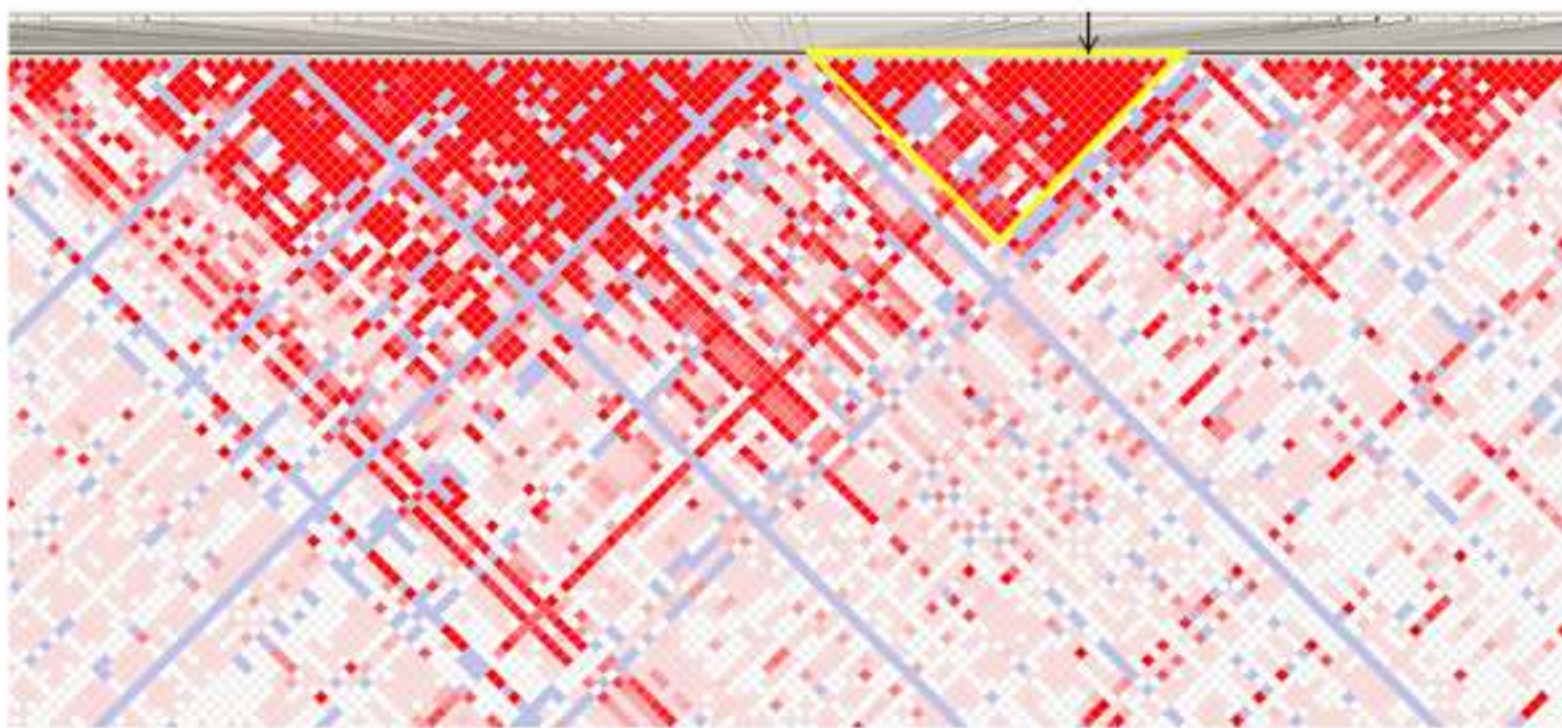

Figure S2

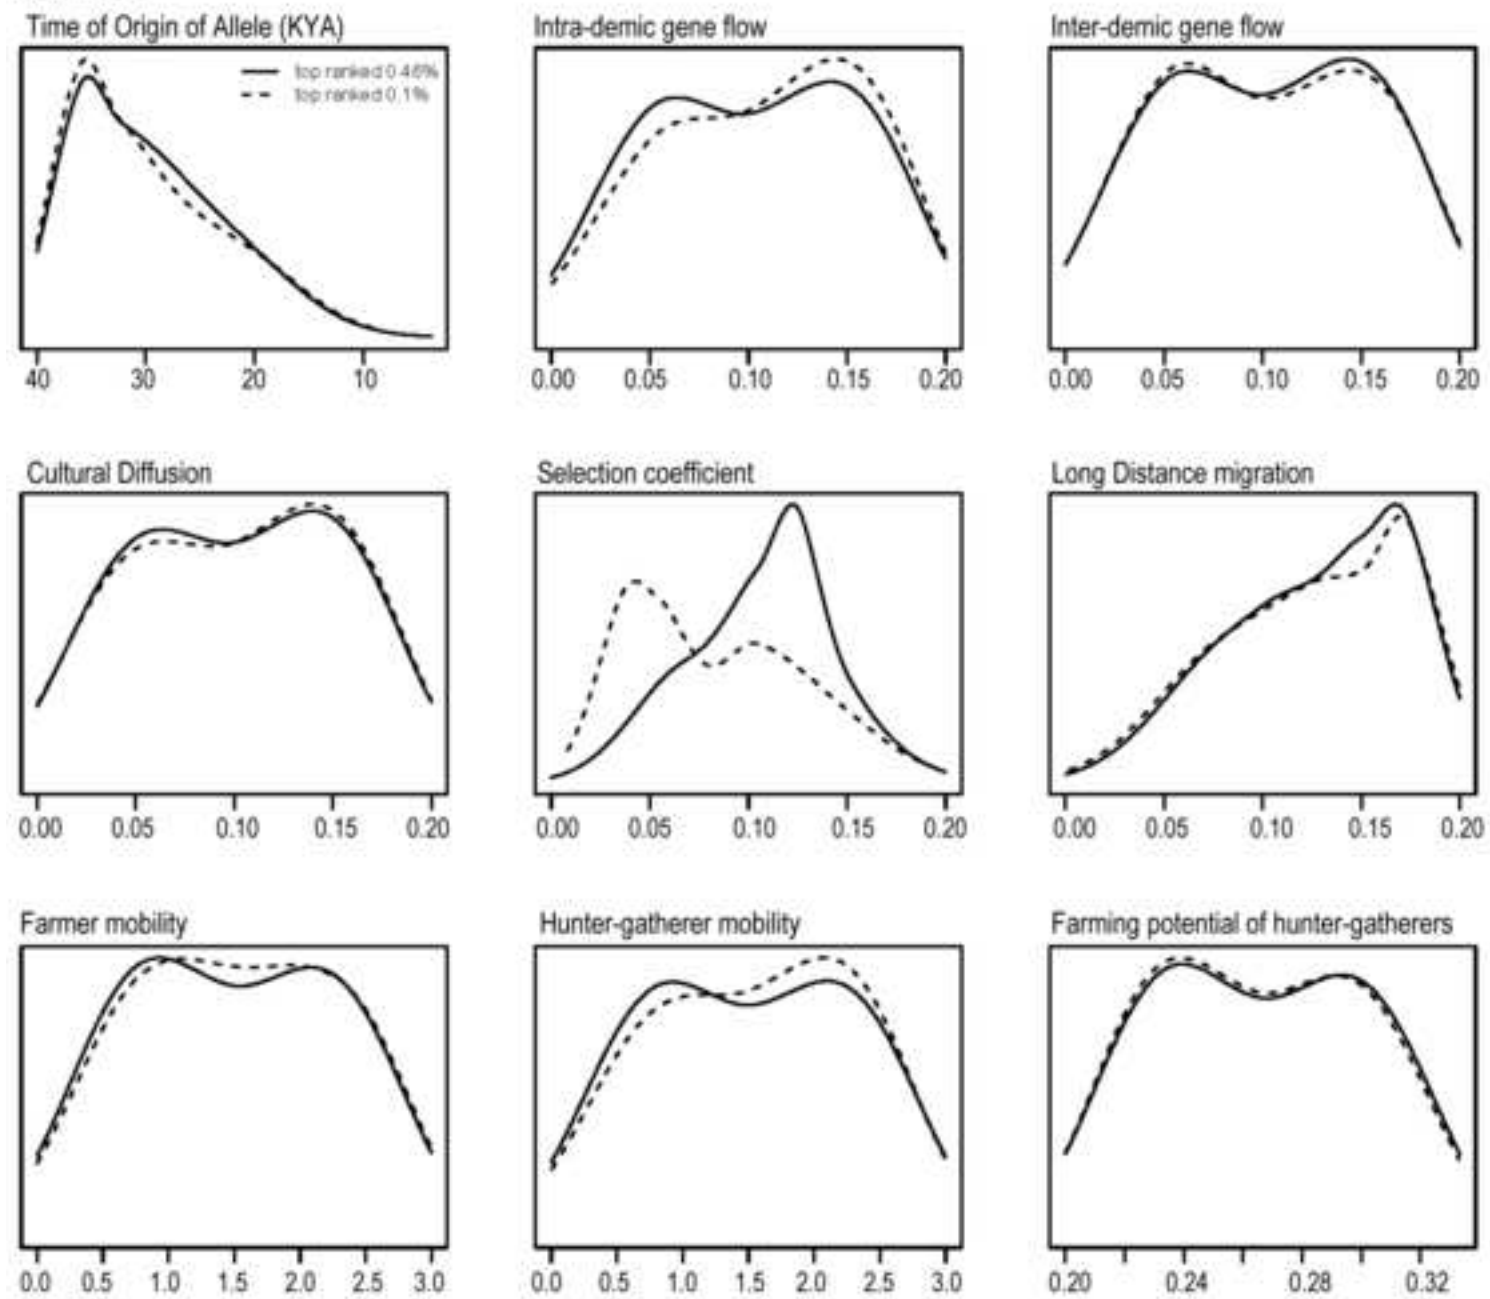

Figure S3

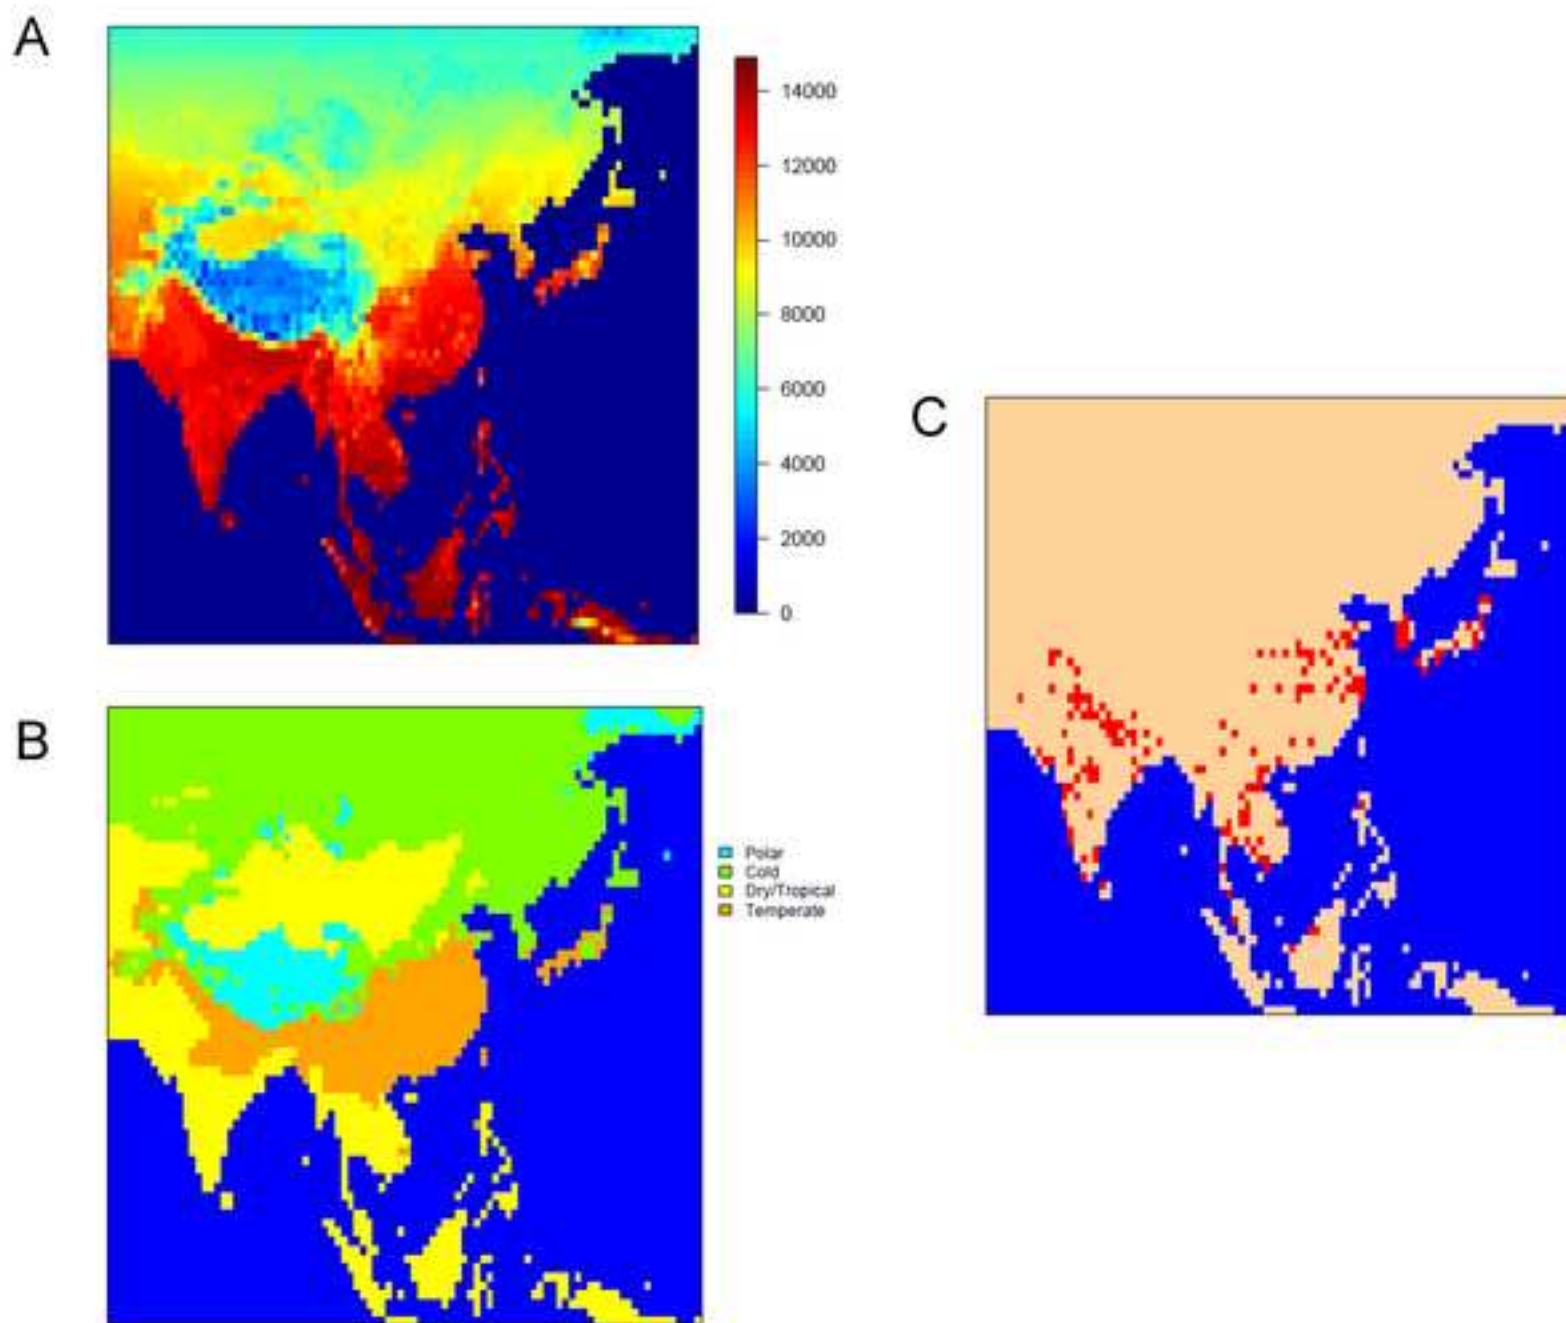

Figure S4

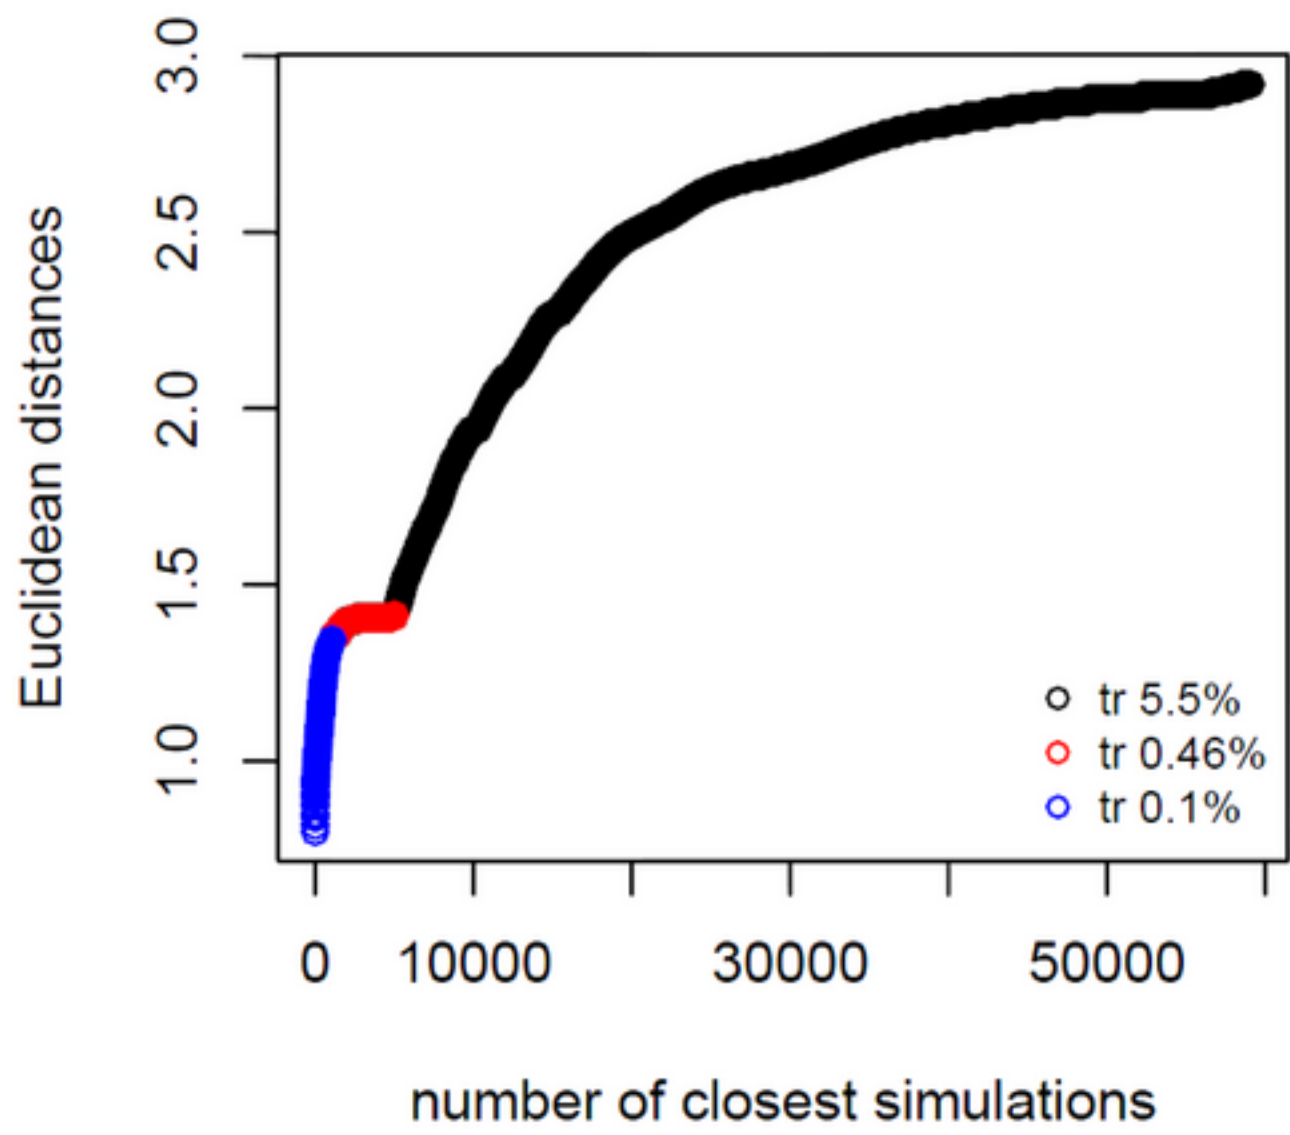

Figure S5

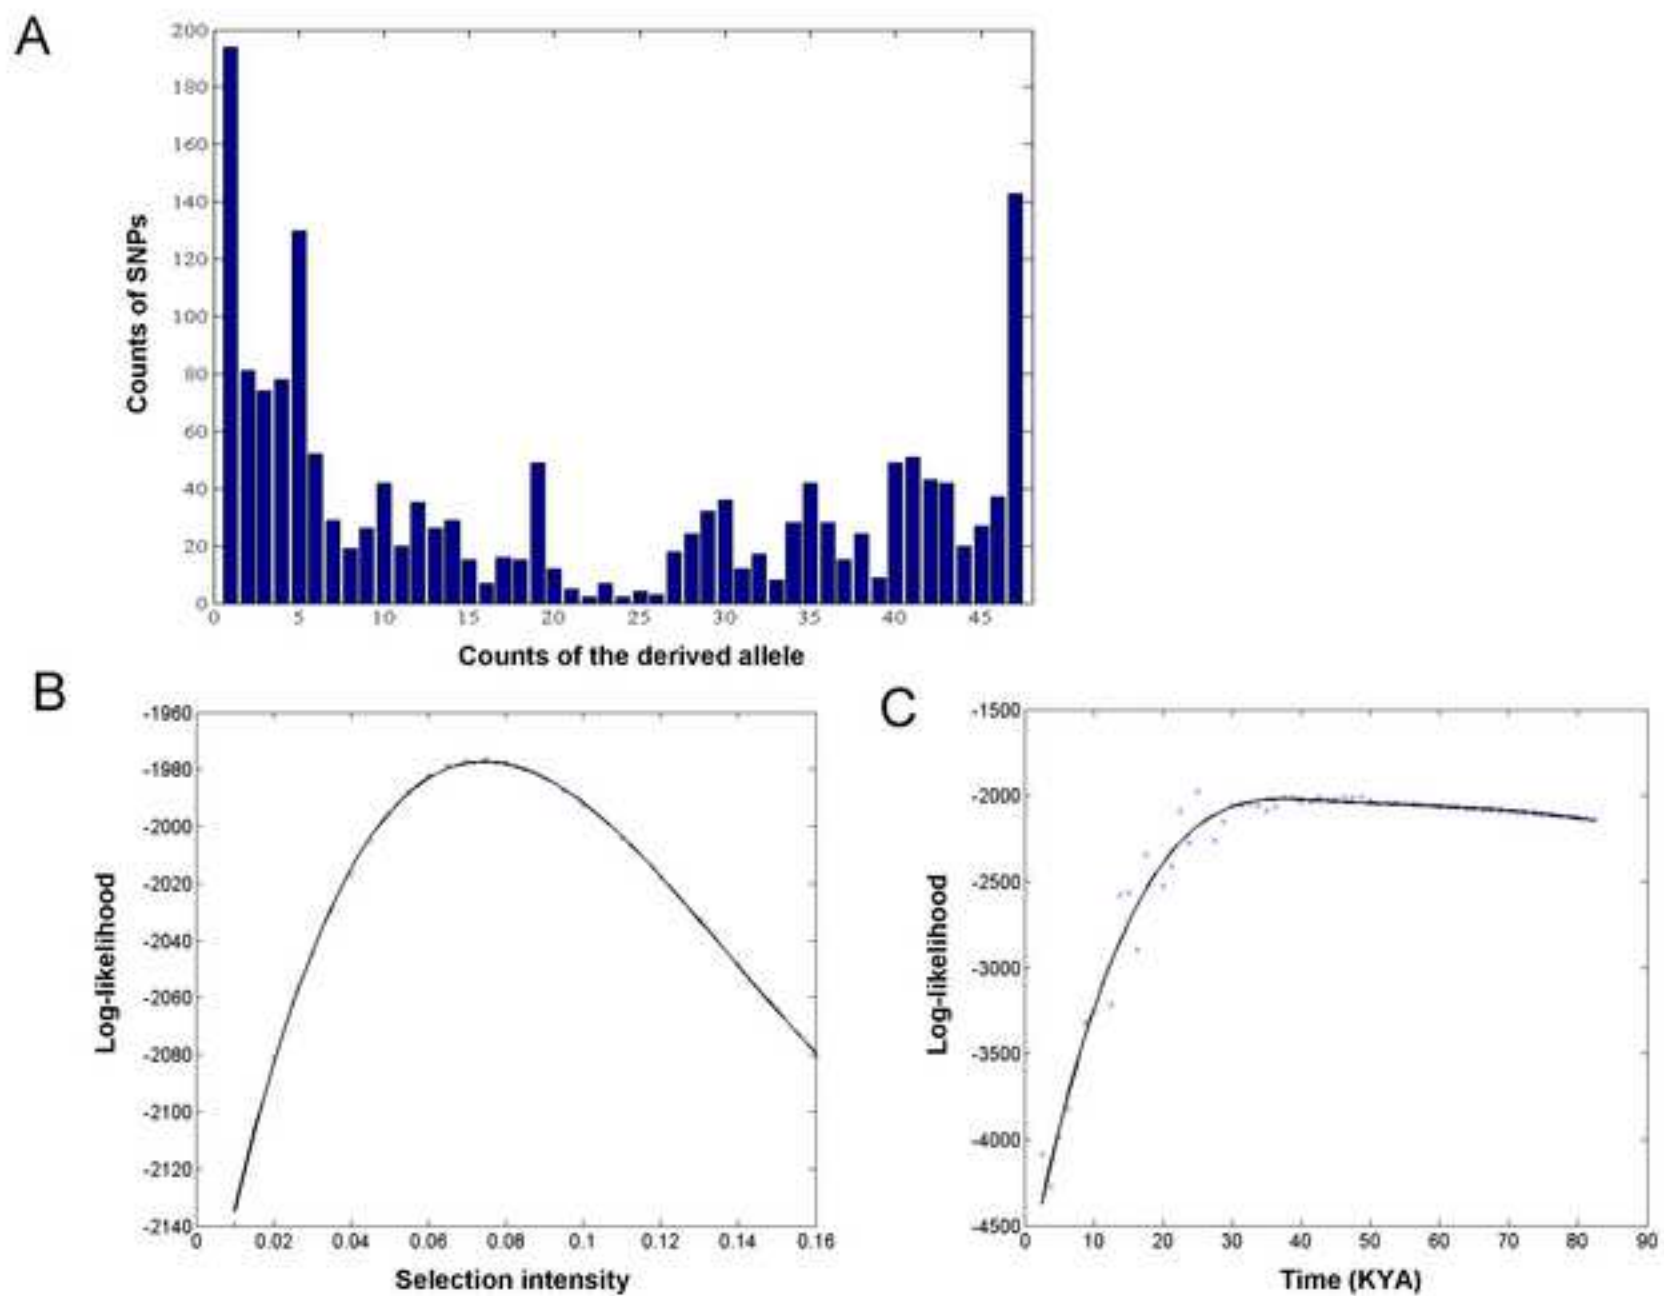

Figure S6

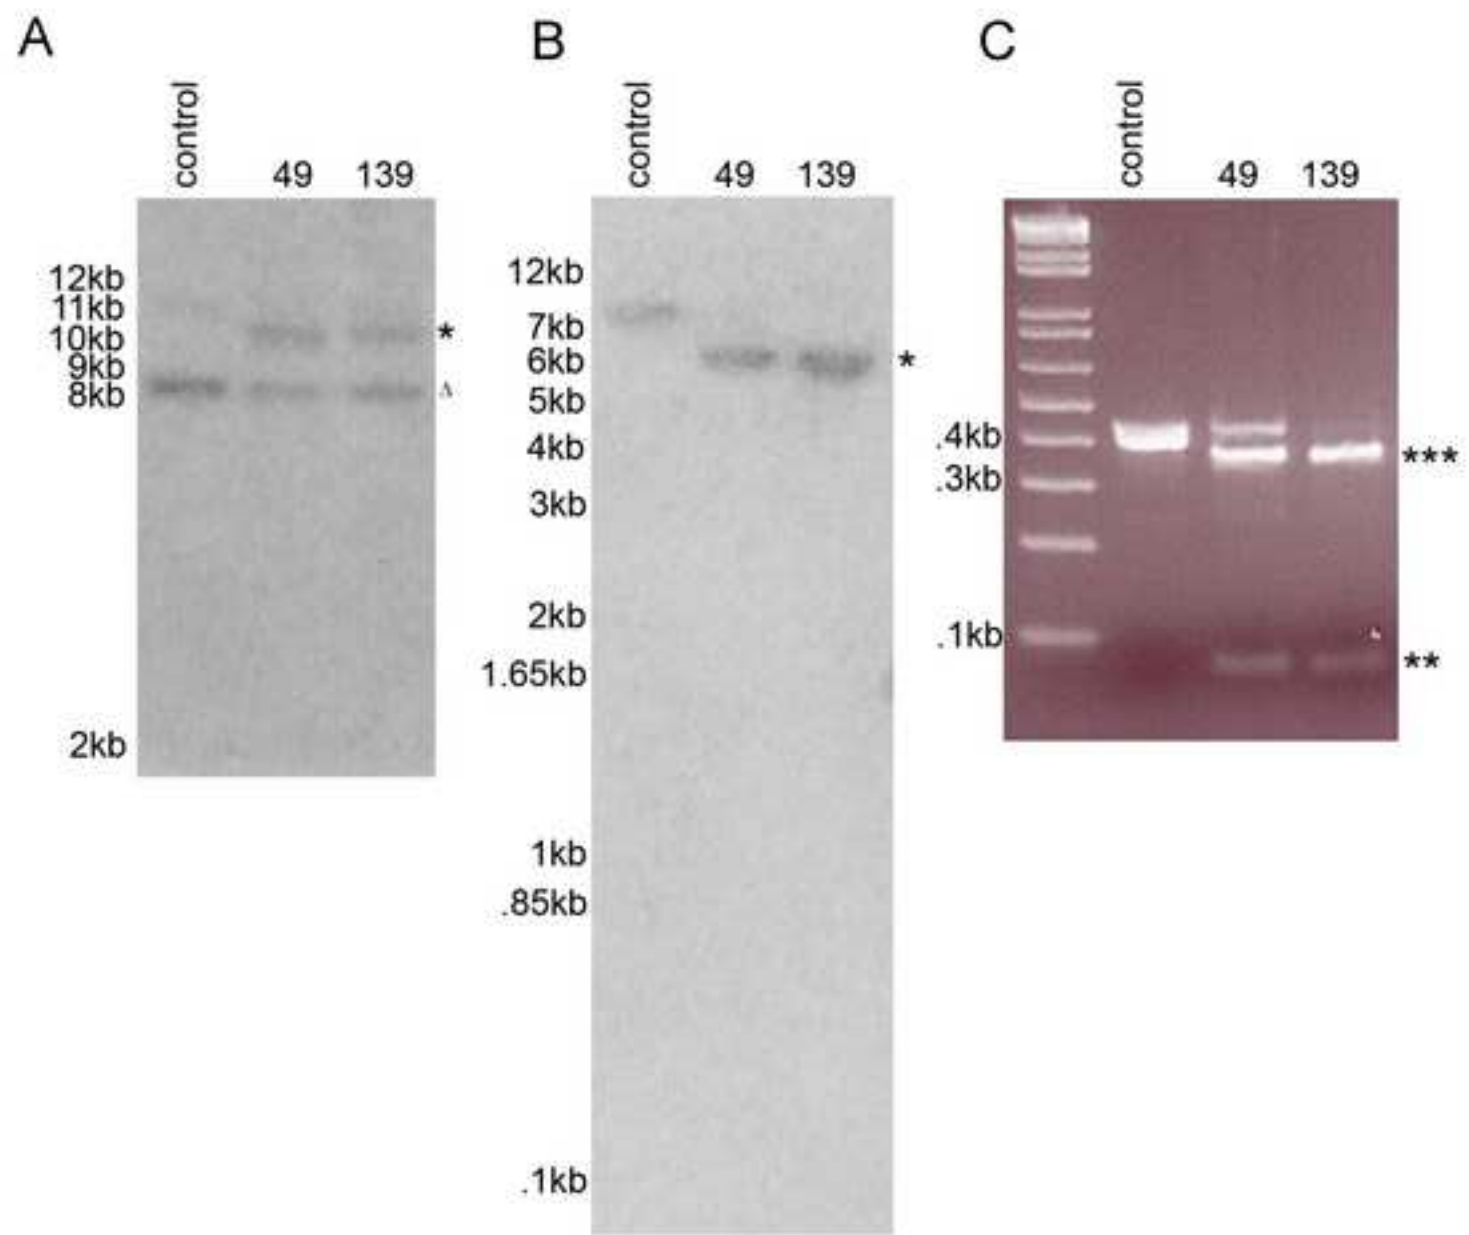



Figure S7

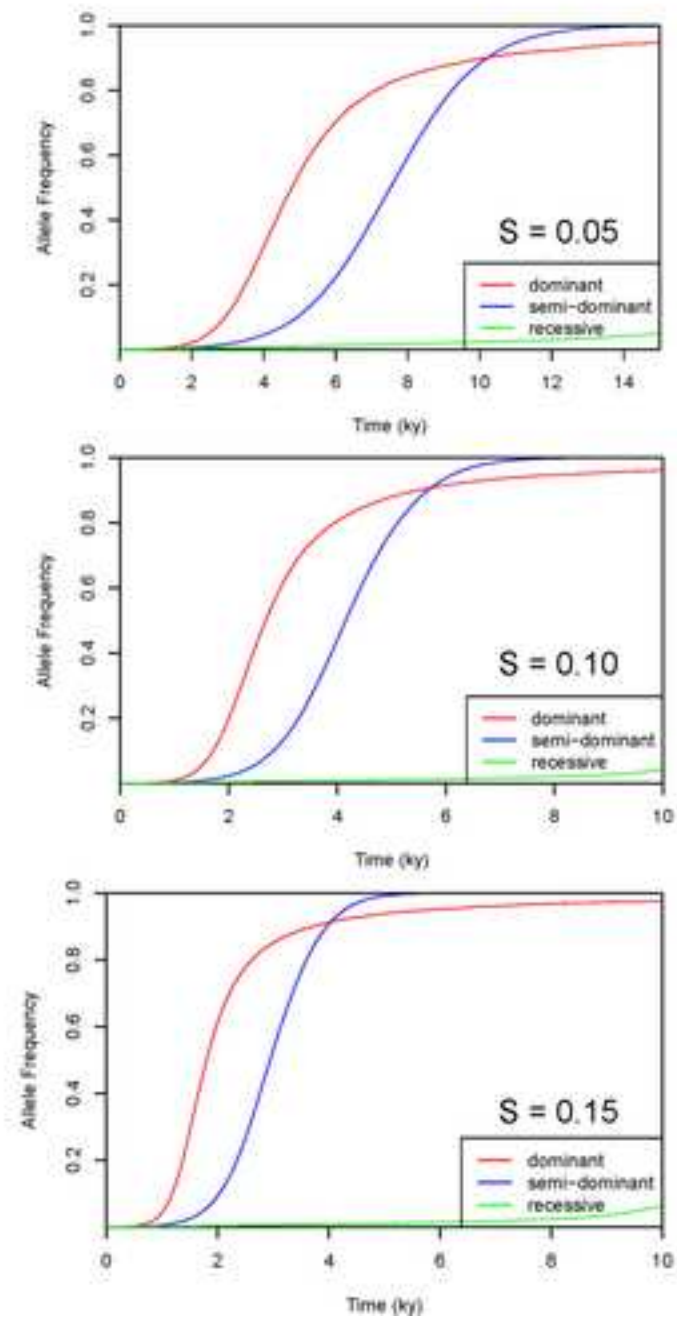

Supplement: NIHMS435603-supplement-02.pdf [file NIHMS435603-supplement-02.pdf]
